# Supplementary material for: Highly diastereoselective reduction of ferrocene bis-imines with methyllithium and the formation of C2-symmetric Zr complexesElectronic supplementary information (ESI) available: experimental procedures and characterization data for all new compounds. See http://www.rsc.org/suppdata/cc/b3/b308360h/
Source: Royal Society of Chemistry journal article supplement (doi:10.1039/b308360h), 2003-01-01
Supplement: b308360h.doc [file b308360h.doc]

## Supplementary Information

Highly Diastereoselective Reduction of Ferrocene Bis-Imines with Methyllithium and the Formation of C2-Symmetric Zr Complexes

Alexandr Shafir, Dorothea Fiedler and John Arnold*

Department of Chemistry, University of California, Berkeley, and the Chemical Sciences Division, Lawrence Berkeley National Laboratory, Berkeley, CA, 94720-1460

### Synthesis and spectroscopic characterization.

### Experimental Section

**General considerations.** Standard Schlenk-line and glove box techniques were used unless otherwise indicated. Diethyl ether, benzene and toluene were purified by passage through a column of activated alumina. Tetrahydrofuran was purified by passage through molecular sieves. All solvents were degassed with nitrogen prior to use. C6D6 was purchased from Cambridge Isotope Laboratories and vacuum transferred from sodium/benzophenone. MeLi (1.4M in Et2O) was purchased from Aldrich. Zr(CH2Ph)41 and 1,1’-diaminoferrocene2 were prepared by published methods. Melting points of the air-sensitive compounds were determined in sealed capillary tubes under nitrogen and are uncorrected. 1H and 13C NMR spectra were recorded at ambient temperature on a Bruker DRX-500 spectrometer (University of California, Berkeley). 1H NMR chemical shifts are given relative to C6D5H (7.16 ppm). 13C{1H} NMR spectra are relative to C6D6 (128.0 ppm). Elemental analyses and mass spectrometry measurements were performed at the Microanalytical Laboratory of the College of Chemistry, University of California. Berkeley.

**Fc[N=C(H)Ph]2 (1).3** A suspension of Fc(NH2)2 (4.00 g, 18.5 mmol) in 100 mL of deoxygenated EtOH was treated with benzaldehyde (4.31 g, 40.7 mmol). The yellow solution turned red immediately and a dark red solid began to precipitate. The reaction mixture was allowed to stir for 10 h. The product was isolated by filtration, washed with 5 mL of cold EtOH and dried *in vacuo* affording 6.89 g of a dark-burgundy microcrystalline solid (93%). Mp. 126 - 128 °C. 1H NMR (C6D6),  8.38 (s, 2H, N=C*H*), 7.68 (m, 4H, *o*-Ph), 7.10 – 7.02 (m, 6H, *m-*Ph and *p-*Ph), 4.59 (virt t, 4H, Fc), 4.10 (virt t, 4H, Fc). 13C NMR (C6D6), δ 157.9, 137.4, 130.2, 128.7, 128.3, 106.1 (Fc*ipso*), 68.8 (Fc), 64.8 (Fc). Anal. Calcd for C24H20FeN2: C, 73.48; H, 5.14; N, 7.14. Found: C, 73.39; H, 5.16; N, 7.15.

**Fc(N=C(H)p-tol)2 (2).** A suspension of Fc(NH2)2 (1.54 g, 7.11 mmol) in 100 mL of deoxygenated EtOH was treated with *p*-tolualdehyde (1.84 mL, 15.6 mmol). The yellow solution turned red, and precipitation of a red solid started. The reaction mixture was allowed to stir for 5 h. The product was isolated by filtration, washed with 10 mL of cold EtOH and dried under reduced pressure. The product, a bright red microcrystalline solid, was obtained in 95% yield (2.84 g). Mp. 173 - 174 °C. 1H NMR (C6D6), δ 8.42 (s, 2H, N=C*H*), 7.64 (d, 2H, Ar, 3*J* = 8.1 Hz), 6.86 (d, 2H, Ar, 3*J* = 7.9 Hz), 4.61 (virt t, 4H, Fc), 4.11 (virt t, 4H, Fc). 13C NMR (C6D6), δ 157.8, 140.2, 135.1, 129.4, 128.4 (all N=CH and Ar), 106.4 (Fc*ipso*), 68.7 (Fc), 64.7 (Fc), 21.4 (Me). Anal. Calcd for C26H24FeN2: C, 74.29; H, 5.76; N, 6.66. Found: C, 74.06; H, 5.83; N, 6.70.

**Fc[NCH(Me)(Ph)]2H2 (3).** Bis-imine **1** (3.00 g, 7.65 mmol) was suspended in 40 mL of toluene and the resulting dark-red mixture was cooled to –60 0C. A solution of MeLi in Et2O (1.4 M, 16.8 mmol) was added dropwise *via* syringe. The resulting dark-blue solution was allowed to warm up slowly. At approx. –8 oC the solution became red. The reaction mixture was then allowed to warm up to room temperature. After stirring for 1 h at room temperature the mixture was hydrolyzed by adding 5 mL H2O under an N2 counterflow. After 5 min of stirring a mixture a yellow solution and white LiOH formed. At this point the volatile components were removed under reduced pressure and the resulting orange oil was dried *in vacuo* for 10 h. The oil was extracted with 40 mL of benzene and filtered leaving behind LiOH. Benzene was removed under reduced pressure affording 2.98 g (92%) of **3** as an orange oil. After 1 week the product solidified into an orange crystalline solid. 1H NMR analysis shows the product to be a mixture of the RR/SS isomer (*trans*, 95%) and the RS isomer (*cis*, 5%). Major product (**3-*trans*)**: 1H NMR (C6D6),  7.34 (m, 4H, *o*-Ph), 7.20 (m, 4H, *m*-Ph), 7.10 (m, 2, *p*-Ph), 4.09 (qd, *J*H-H(Me) = 6.7 Hz, *J*H-H(NH) = 2.5 Hz, 2H, MeC*H*), 3.80 (m, 2H, Fc), 3.78 (m, 2H, Fc), 3.66 (m, 2H, Fc), 3.54 (m, 2H, Fc), 2.35 (d, *J* = 2.5 Hz, 2H, NH), 1.19 (d, *J* = 6.7 Hz) ppm. 13C{1H} NMR (C6D6),  146.5, 128.4, 128.2, 126.1, 109.4 (Fc*ispo*), 63.4 (Fc), 63.3 (Fc), 57.6 (Fc), 57.4 (Me*C*H), 57.10 (Fc), 25.2 (*Me*CH) ppm. Minor product (**3-*cis*)**: 1H NMR (C6D6),  7.34 (m, 4H, *o*-Ph), 7.20 (m, 4H, *m*-Ph), 7.10 (m, 2, *p*-Ph), 4.09 (qd, *J*H-H(Me) = 6.7 Hz, *J*H-H(NH) = 2.5 Hz, 2H, MeC*H*), 3.80 (m, 2H, Fc), 3.78 (m, 2H, Fc), 3.67 (m, 2H, Fc), 3.52 (m, 2H, Fc), 2.37 (d, *J* = 2.5 Hz, 2H, NH), 1.21 (d, *J* = 6.7 Hz) ppm. Anal. Calcd for C26H28FeN2: C, 73.59; H, 6.65; N, 6.60. Found: C, 73.32; H, 6.45; N, 6.78.

**Fc[NCH(Me)(*p*-tol)2] (4).** A suspension of bis-imine **2** (1.00 g, 2.38 mmol) in 40 mL THF was cooled to –60 °C. Addition of MeLi (1.4 M in Et2O, 2.8 mmol,) and warming to –30 oC led to the formation of a dark-blue solution. The reaction mixture was allowed to slowly warm to room temperature. At this point the solution becomes red. The mixture was allowed to stir for another 2 h and was quenched with 2 mL of H2O. The addition of water was performed quickly under a counterflow of N2. After 5 min of stirring the solution became yellow and a white precipitate formed. At this point the volatile components were removed under reduced pressure and the resulting orange oil was dried *in vacuo* for 10 h. The oil was extracted with 40 mL of benzene and filtered leaving behind LiOH. Benzene was removed under reduced pressure affording **4** as orange air-sensitive oil in 76% yield (820 mg). After 3 days the product solidified into a red crystalline solid. 1H NMR analysis shows the product to be a mixture of the RR/SS isomer (*trans*, 95%) and the RS isomer (*cis*, 5%). Major product (**4-*trans*)**: 1H NMR (C6D6), δ 7.29 (d, 4H, Ar, 3*J* = 7.9 Hz), 7.05 (d, 2H, Ar, 3*J* = 7.8 Hz), 4.12 (qd, 2H, N-CH, 3*J* = 6.7 Hz, 3*J* = 2.3 Hz), 3.83 (m, 2H, Fc), 3.80 (m, 2H, Fc), 3.69 (m, 2H, Fc), 3.60 (m, 2H, Fc), 2.38 (d, 2H, NH, 3*J* = 2.0 Hz), 2.15 (s, 6H, Ph-CH3), 1.22 (d, 6H, CH3, 3*J*H-H = 6.7 Hz) ppm. 13C NMR (C6D6), δ 144.0, 136.4, 129.5, 126.5 (Ar), 109.0 (Cp-N), 63.7, 63.6, 58.1, 57.5, 57.5 (Cp, N*C*(CH3)H-Ar), 25.6 (N-C(*C*H3)H-Ar), 21.1 (Ph-CH3) ppm. Anal. Calcd for C28H32FeN2: C, 74.33; H, 7.13; N, 6.19. Found: C, 74.31; H, 7.03; N, 6.38.

**Fc[NCH(Me)Ph]2ZrBn2 (5).** A solution of diamine **3** (0.580 g, 1.37 mmol) in 20 mL of toluene was added to a solution of ZrBn4 (0.640 g, 1.40 mmol) in 20 mL of toluene. The flask was wrapped in aluminum foil and the reaction mixture was allowed to stir for 14 h. At this point the solvent was removed under reduced pressure. The remaining yellow solid was extracted with Et2O and the resulting solution was filtered. The removal of Et2O afforded 0.820 g of **5** as an orange powder (86%). 1H NMR (only the major (90%) *trans* diastereomer is described) (C6D6),  7.25 –6.90 (m, 20H, Ar), 4.89 (q, 3*J* = 6.7 Hz, 2H, NC*H*), 3.77 (m, 2H, Fc), 3.75 (m, 2H, Fc), 2.90 (m, 2H, Fc), 2.81 (m, 2H, Fc), 2.66 (d, 2*J* = 10.4 Hz, 2H, ZrC*H*2), 2.62 (d, 2*J* = 10.4 Hz, 2H, ZrC*H*2), 1.67 (d, 3*J* = 6.7 Hz, 6H, Me) ppm. Anal. Calcd for C40H40FeN2Zr: C, 69.04; H, 5.79; N, 4.03. Found: C, 68.70; H, 5.60; N, 3.79.

**Fc(NCH(Me)(*p*-tol)2ZrBn2 (6).** A solution of diamine **4** (0.525 g, 1.16 mmol) in 20 mL of toluene was added to a solution of ZrBn4 (0.528 g, 1.40 mmol) in 20 mL of toluene. The flask was wrapped in aluminum foil and the reaction mixture was allowed to stir for 14 h. At this point the solvent was removed under reduced pressure. The remaining yellow solid was extracted with Et2O and the resulting solution was filtered. Removal of Et2O afforded 0.655 g of **6** as an orange powder (78%)**.** 1H NMR (only the major (90%) *trans* diastereomer is described): (C6D6), δ 7.17 - 6.98 (m, 14H, Ar), 6.86 (t, 2H, Ar, 3*J* = 7.3 Hz), 6.38 (d, 2H, Ar, 3*J* = 7.1 Hz), 4.90 (q, 2H, N-CH, 3*J* = 6.7 Hz), 3.79 (m, 2H, CpH), 3.77 (m, 2H, CpH), 2.96 (m, 2H, CpH), 2.85 (m, 2H, CpH), 2.69 (d, 2H, Zr-CH2-Ph, 2*J* = 10.4 Hz), 2.65 (d, 2H, Zr-CH2-Ph, 2*J* = 10.4 Hz), 2.11 (s, 6H, Ph-CH3), 1.71 (d, 6H, Me , 3*J* = 6.7 Hz) ppm. 13C NMR (C6D6), δ 144.2, 142.7, 137.8, 136.5, 129.3, 129.2, 129.0, 128.5, 127.1, 125.6, 121.7 (Ar), 84.4 (Fc*ipso*), 71.2, 70.7, 70.5, 70.3, 65.8, 65.0 (all ZrCH2, F and N*C*Ar), 22.5, 21.1 (all Me) ppm.

### Notes and references

1 J. J. Felten and W. P. Anderson, *J. Organomet. Chem.*, 1972, **36**, 87.

2 A. Shafir, M. P. Power, G. D. Whitener, and J. Arnold, *Organometallics*, 2000, **19**, 3978.

3 V. C. Gibson, N. J. Long, E. L. Marshall, P. J. Oxford, A. J. P. White, and D. J. Williams, *J. Chem. Soc.-Dalton Trans.*, 2001, 1162.
